# Supplementary material
Source: Springer Nature journal article supplement (https://www.springermedizin.de/resource/supplementary/12891_2010_1087_MOESM9_ESM.pdf/9507684)

## Immediately After Compression

Control Compressed Control Compressed

MAFbx/atrogenin-1

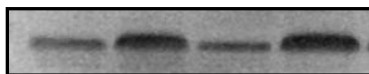

42kDa

β-tubulin

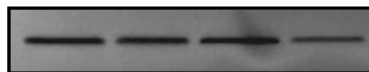

50kDa

## MAFbx/atrogenin-1 Protein

MAFbx/Atrogenin-1 protein content  
normalized to β-tubulin (arbitrary unit)

4  
3.5  
3  
2.5  
2  
1.5  
1  
0.5  
0

Control

Compressed

\*

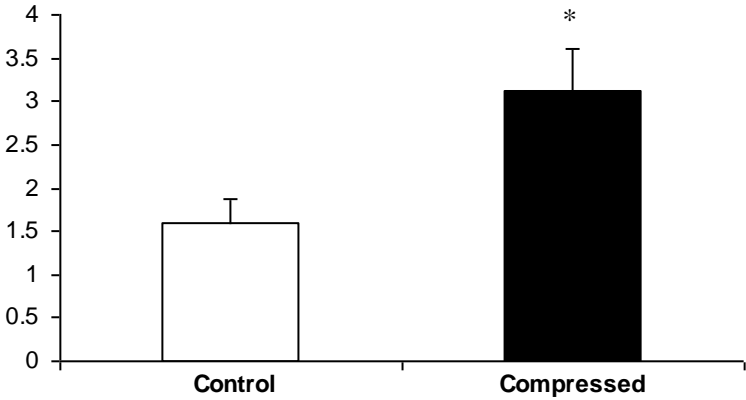

Supplement: MOESM9 [file 9507684]
